# Supplementary material for: Unlocking COVID therapeutic targets: A structure-based rationale against SARS-CoV-2, SARS-CoV and MERS-CoV Spike
Source: PubMed Central journal article supplement (PMC7452956; doi:10.1016/j.csbj.2020.07.017), 2020-07-31
Supplement: mmc2.pdf [file mmc2.pdf]

This image displays a complex musical score consisting of approximately 20 systems of staves. Each system contains multiple staves, likely representing different instruments or voices. The notation is dense, with many notes and rests. A significant feature of the score is the use of red and blue highlights on various notes and stems across the staves, which may indicate specific musical elements or performance instructions. The overall layout is highly structured and repetitive, typical of a large-scale musical composition or a detailed study score.
