# Supplementary material for: Unlocking COVID therapeutic targets: A structure-based rationale against SARS-CoV-2, SARS-CoV and MERS-CoV Spike
Source: PubMed Central journal article supplement (PMC7452956; doi:10.1016/j.csbj.2020.07.017), 2020-07-31

S1 SUBUNIT

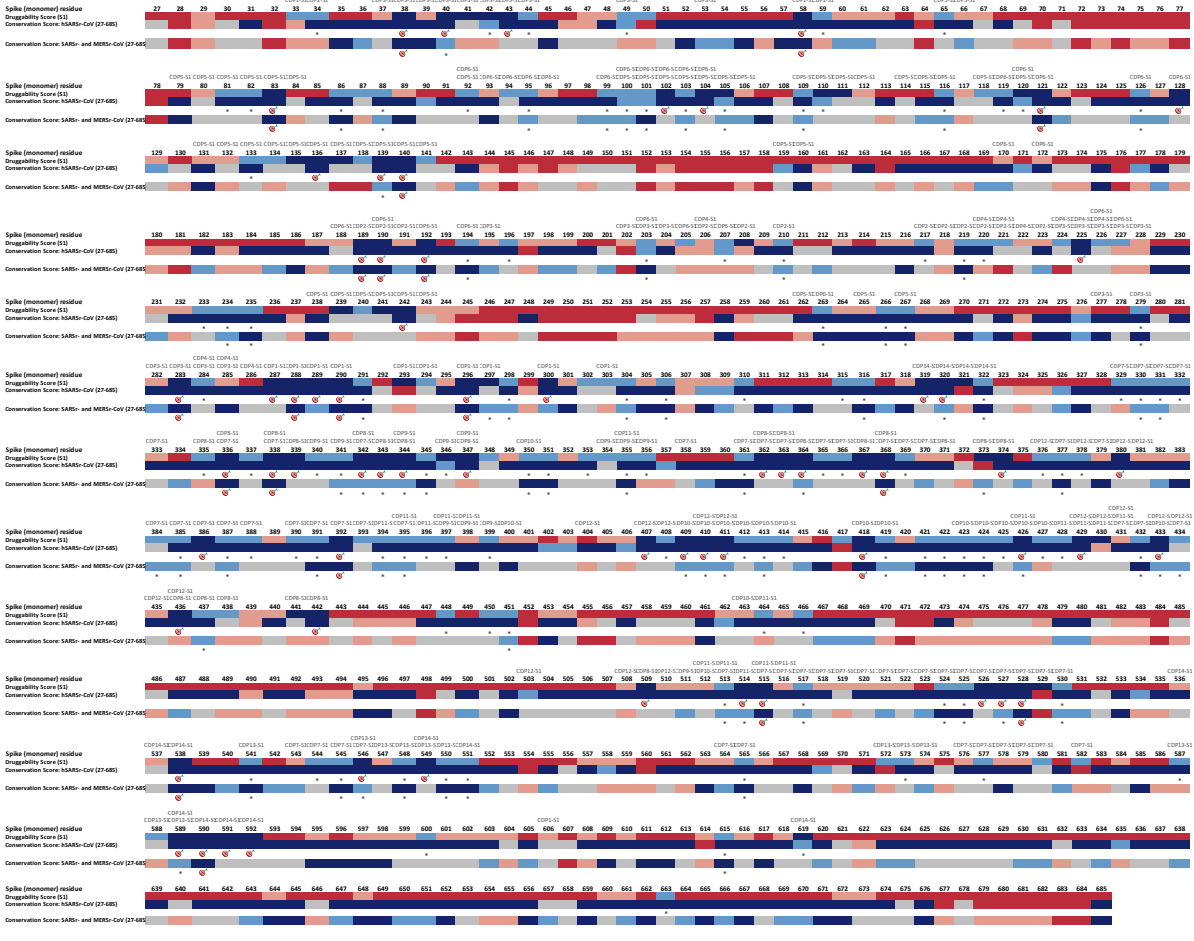

S2 SUBUNIT

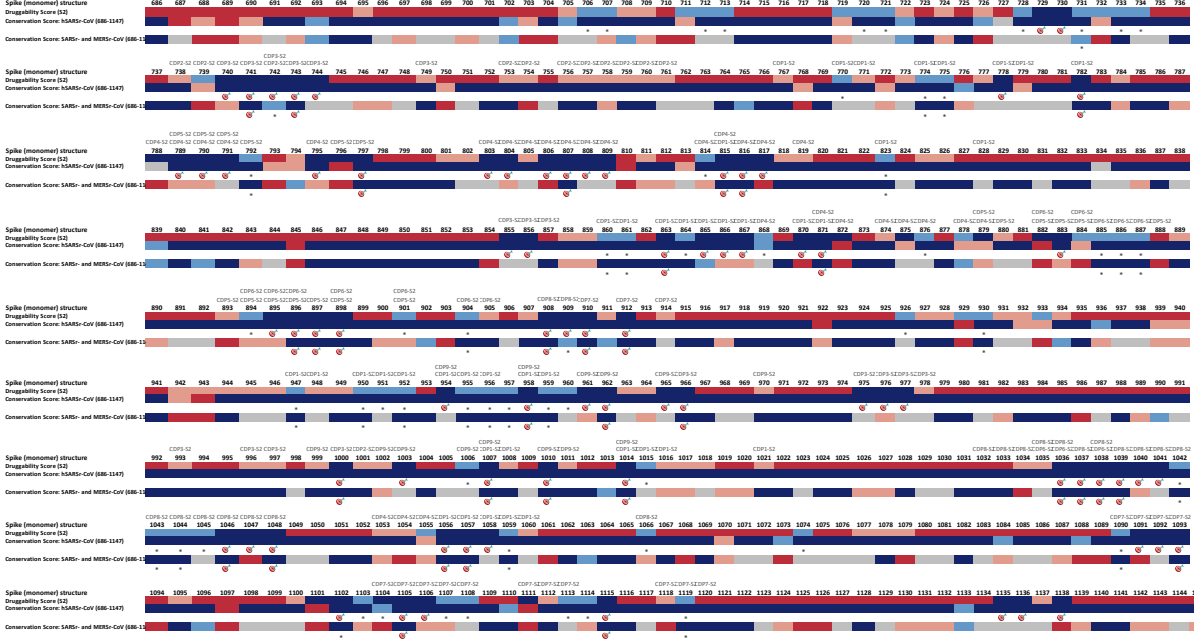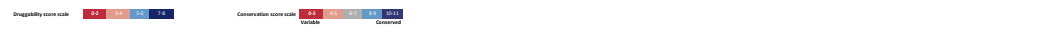

Supplement: mmc3.pdf [file mmc3.pdf]
